# Supplementary material
Source: MDPI journal article supplement (https://www.mdpi.com/2673-7426/4/1/36)
Supplement: s1 [file s1]

**Supplementary Table S1: Comparison of reported machine learning models for prediction of iron deficiency anemia(IDA)**

| Paper                                      | Target                                                                                         | Features                                                                     | Data                                                                                       | Subject Age group    | Model with highest performance                               | Reported performance metrics                                                                         | Observations                                                                             |
|--------------------------------------------|------------------------------------------------------------------------------------------------|------------------------------------------------------------------------------|--------------------------------------------------------------------------------------------|----------------------|--------------------------------------------------------------|------------------------------------------------------------------------------------------------------|------------------------------------------------------------------------------------------|
| Bellinger, Amid, Japkowicz, & Victor, 2015 | Predict IDA, $\beta$ -thalassemia and IDA+ $\beta$ -thalassemia                                | sex, age, Hb, Hct, RBC, RDW                                                  | 562 anemic instances 59.3% IDA, 23.3% to $\beta$ -thalassemia and 17.4% IDA+ $\beta$ -thal | Pediatric population | MLP                                                          | Precision:0.7278<br>Recall:0.8308<br>F1score: 0.7212<br>ROC-AUC 0.9102                               | -                                                                                        |
| Ayyıldız & Tuncer, 2020                    | Differential diagnosis of IDA and $\beta$ -thalassemia                                         | Gender, RBC, Hb , HCT , MCV ,MCH, MCHC and RDW                               | 152 patients diagnosed with $\beta$ -thalassemia and 190 diagnosed with IDA                | 1-88 years           | Neighborhood Component Analysis                              | Accuracy: 0.953<br>Precision:0.952<br>Recall: 0.962<br>F1 score:0.957<br>ROC AUC:0.97                | -                                                                                        |
| Saputra, Sunat, & Ratnaningsih, 2023       | Differential diagnosis of B-thalassemia, IDA and hemoglobin E or combination of IDA with other | RBC, Hb, HCT, RDW, MCV, MCH, MCHC                                            | 190, 24 with BTT, 41 with Hb-E, 104 with IDA and 21 with combinations                      | 15-41 years          | Extreme Learning Machine                                     | Metrics for IDA classification<br>Accurasy:98.44<br>Precision: 100<br>Recall:93.75<br>F1 score:96.77 | -                                                                                        |
| Yıldız, Yurtay, & Öneç, 2021               | 12 different types of anemia including IDA                                                     | Age, sex, CBC data, ferritin, serum iron parameters, vitamin B12, bilirubin. | 1663                                                                                       | 20-109 years         | Boosted trees                                                | Accurasy:83.2<br>Precision: 96.7<br>Recall:78.1<br>F1 score:0.864<br>ROC AUC:0.98                    | Ferritin and serum iron included in both the train and test data set                     |
| Dogan & Turkoglu, 2008                     | IDA and Non IDA                                                                                | Serum iron, total iron binding capacity and serum ferritin                   | 96                                                                                         | Not given            | Decision support system                                      | 100% sensitivity and specificity                                                                     | Serum iron parameters and ferritin are included in classification. No CBC data involved. |
| Yilmaz, Dagli, & Allahverdi, 2013          | IDA and Non IDA                                                                                | Hb, MCV, serum iron, total binding capacity (TIBC), and serum ferritin       | 100                                                                                        | Not given            | Rule based classification based on specific reference values | The success level of the system was detected between 90% and 95.8% with different parameters         | Serum iron parameters and Ferritin included in rule-based classification                 |

|                                        |                                         |                                                    |                             |                        |                           |                                                                                  |                                                                                                                                                                 |
|----------------------------------------|-----------------------------------------|----------------------------------------------------|-----------------------------|------------------------|---------------------------|----------------------------------------------------------------------------------|-----------------------------------------------------------------------------------------------------------------------------------------------------------------|
| Azarkhish, Raoufy, & Gharibzadeh, 2012 | IDA or No IDA                           | MCV, MCH, MCHC, Hb/RBC                             | 203 (92 males; 111 females) | 55.8± 17.78            | Artificial Neural Network | Accuracy:96.29<br>Recall: 96.8<br>Specificity: 95.6                              | Classification of ID is based on serum iron, and not ferritin which is gold standard suggested method by WHO.                                                   |
| Terzi et al., 2022                     | IDA and Non IDA                         | Age, Ferritin, iron, Hb, HCT, MCV, RDW, RBC, MCHC, | 516                         | 17-89                  | XG boost                  | Accuracy:0.98<br>Recall:0.99<br>ROC AUC: 0.99                                    | Ferritin used as feature in both train and test datasets                                                                                                        |
| Kurstjens et al., 2022                 | Prediction of low serum ferritin or IDA | Age, sex, CBC data and CRP                         | 8021 Anemic adult subjects  | More than 18 years age | Random Forest             | Specificity:92<br>Sensitivity:98<br>ROC AUC: 0.90                                | The model was developed with data of only adult anemic subjects, and in a hospital setting. Additional CRP variable is included in the features along with CBC. |
| Proposed Model                         | IDA or No IDA                           | Age, gender, pregnancy status, CBC data            | 19995 subjects              | 1-60 years             | Gradient Boost            | Accuracy:0.97<br>Precision: 0.63<br>Recall: 0.98<br>ROC AUC: 0.99<br>PR AUC:0.86 | Survey data from general population, includes all age groups (1-60 years) including pregnant women.                                                             |

1. Bellinger, C.; Amid, A.; Japkowicz, N.; Victor, H. Multi-label classification of anemia patients. In Proceedings of 2015 IEEE 14th International Conference on Machine Learning and Applications (ICMLA); pp. 825-830.
2. Ayyıldız, H.; Tuncer, S.A. Determination of the effect of red blood cell parameters in the discrimination of iron deficiency anemia and beta thalassemia via Neighborhood Component Analysis Feature Selection-Based machine learning. Chemometrics and Intelligent Laboratory Systems 2020, 196, 103886.
3. Saputra, D.C.E.; Sunat, K.; Ratnaningsih, T. A new artificial intelligence approach using extreme learning machine as the potentially effective model to predict and analyze the diagnosis of anemia. In Proceedings of Healthcare; p. 697.

4. Yıldız, T.K.; Yurtay, N.; Öneç, B. Classifying anemia types using artificial learning methods. *Engineering Science and Technology, an International Journal* 2021, 24, 50-70.
5. Dogan, S.; Turkoglu, I. Iron-deficiency anemia detection from hematology parameters by using decision trees. *International Journal of Science & Technology* 2008, 3, 85-92.
6. Yilmaz, A.; Dagli, M.; Allahverdi, N. A fuzzy expert system design for iron deficiency anemia. In *Proceedings of 2013 7th International Conference on Application of Information and Communication Technologies*; pp. 1-4.
7. Azarkhish, I.; Raoufy, M.R.; Gharibzadeh, S. Artificial intelligence models for predicting iron deficiency anemia and iron serum level based on accessible laboratory data. *Journal of medical systems* 2012, 36, 2057-2061.
8. Terzi, E.; Saribacak, B.; Saglam, F.; Cengiz, M.A. A Novel Expert System for Diagnosis of Iron Deficiency Anemia. *Comput Math Methods Med* 2022, 2022, 7352096, doi:10.1155/2022/7352096.
9. Kurstjens, S.; De Bel, T.; Van Der Horst, A.; Kusters, R.; Krabbe, J.; Van Balveren, J. Automated prediction of low ferritin concentrations using a machine learning algorithm. *Clinical Chemistry and Laboratory Medicine (CCLM)* 2022, 60, 1921-1928.
